# Supplementary material
Source: publisher figshare collection journal article supplement (https://tandf.figshare.com/ndownloader/files/14679941)
Supplement: Supplementary file 1 [file 14679941]

| **Supplementary Table 1.** The proportion of each IBD-specific drugs to total medication cost during the study period | | | | | | | | | | | | |
| --- | --- | --- | --- | --- | --- | --- | --- | --- | --- | --- | --- | --- |
|  | 2006 | 2007 | 2008 | 2009 | 2010 | 2011 | 2012 | 2013 | 2014 | 2015 | Average growth rate | *p* for trend |
| IBD (%) |  |  |  |  |  |  |  |  |  |  |  |  |
| 5-ASA | 7.2 | 4.7 | 4.5 | 3.3 | 2.5 | 2.0 | 1.5 | 1.3 | 1.0 | 0.8 | -0.64 | <0.001 |
| Immunomodulators | 0.4 | 0.3 | 0.3 | 0.2 | 0.2 | 0.1 | 0.1 | 0.1 | 0.1 | 0.1 | -0.03 | 0.001 |
| Anti-TNF agents | 27.2 | 49.1 | 50.7 | 62.6 | 71.4 | 79.5 | 84.4 | 85.3 | 89.5 | 90.8 | 6.68 | <0.001 |
| Steroid | 2.1 | 1.3 | 1.2 | 0.9 | 0.6 | 0.4 | 0.3 | 0.2 | 0.2 | 0.1 | -0.20 | <0.001 |
| Other | 63.1 | 44.6 | 43.3 | 32.9 | 25.3 | 18.0 | 13.8 | 13.1 | 9.3 | 8.2 | -5.80 | <0.001 |
| Total | 100.0 | 100.0 | 100.0 | 100.0 | 100.0 | 100.0 | 100.0 | 100.0 | 100.0 | 100.0 |  |  |
| UC (%) |  |  |  |  |  |  |  |  |  |  |  |  |
| 5-ASA | 12.9 | 11.8 | 12.0 | 11.6 | 8.9 | 4.6 | 3.1 | 2.8 | 2.0 | 1.5 | -1.50 | <0.001 |
| Immunomodulators | 0.3 | 0.3 | 0.4 | 0.4 | 0.4 | 0.2 | 0.1 | 0.1 | 0.1 | 0.1 | -0.04 | 0.007 |
| Anti-TNF agents | 0.4 | 0.6 | 0.2 | 0.1 | 20.2 | 62.3 | 74.5 | 76.3 | 83.1 | 84.5 | 12.00 | <0.001 |
| Steroid | 5.1 | 4.6 | 4.1 | 4.5 | 3.1 | 1.4 | 0.8 | 0.7 | 0.4 | 0.3 | -0.62 | <0.001 |
| Other | 81.3 | 82.6 | 83.4 | 83.4 | 67.4 | 31.6 | 21.4 | 20.2 | 14.4 | 13.5 | -9.85 | <0.001 |
| Total | 100.0 | 100.0 | 100.0 | 100.0 | 100.0 | 100.0 | 100.0 | 100.0 | 100.0 | 100.0 |  |  |
| CD (%) |  |  |  |  |  |  |  |  |  |  |  |  |
| 5-ASA | 4.6 | 2.6 | 2.6 | 1.9 | 1.5 | 1.2 | 0.9 | 0.9 | 0.6 | 0.5 | -0.38 | <0.001 |
| Immunomodulators | 0.4 | 0.2 | 0.3 | 0.2 | 0.2 | 0.1 | 0.1 | 0.1 | 0.1 | 0.1 | -0.03 | 0.002 |
| Anti-TNF agents | 39.8 | 62.9 | 63.5 | 73.3 | 79.7 | 84.3 | 87.5 | 88.1 | 91.6 | 93.1 | 5.16 | <0.001 |
| Steroid | 0.7 | 0.4 | 0.4 | 0.3 | 0.2 | 0.2 | 0.1 | 0.1 | 0.1 | 0.1 | -0.06 | <0.001 |
| Other | 54.5 | 33.9 | 33.2 | 24.3 | 18.5 | 14.2 | 11.4 | 10.8 | 7.6 | 6.3 | -4.68 | <0.001 |
| Total | 100.0 | 100.0 | 100.0 | 100.0 | 100.0 | 100.0 | 100.0 | 100.0 | 100.0 | 100.0 |  |  |
| IBD = inflammatory bowel disease; ASA = aminosalicylic acid; TNF = tumor necrosis factor; UC = ulcerative colitis; CD = Crohn’s disease.  All costs are expressed in US dollars ($) and adjusted using the 2015 exchange rate. | | | | | | | | | | | | |
